# Supplementary material
Source: ML conference proceedings conference paper supplement (https://proceedings.neurips.cc/paper_files/paper/2022/hash/eab69250e98b1f9fc54e473cc7a69439-Abstract.html)
Supplement: Supplementary file 1 [file eab69250e98b1f9fc54e473cc7a69439-Supplemental-Conference.zip]

Archive with 1 entries (1 files):
- compfs_full_paper.pdf
